# Supplementary material for: De novo Assembly of Transcriptomes From a B73 Maize Line Introgressed With a QTL for Resistance to Gray Leaf Spot Disease Reveals a Candidate Allele of a Lectin Receptor-Like Kinase
Source: PubMed Central journal article supplement (PMC7083176; doi:10.3389/fpls.2020.00191), 2020-03-13
Supplement: Data_Sheet_2.pdf [file Data_Sheet_2.pdf]

**Table S1.** Optimization of *de novo* assembly parameters for Trinity using reads that mapped to the B73 genome.

| Parameters changed from the Default <sup>1</sup> | Transcripts <sup>2</sup> | Predicted proteins from <i>de novo</i> assembled transcripts <sup>3</sup> | Hits to B73 proteins <sup>4</sup> | B73 Hits/Predicted proteins (%) <sup>5</sup> |
|--------------------------------------------------|--------------------------|---------------------------------------------------------------------------|-----------------------------------|----------------------------------------------|
| None                                             | 61,046                   | 52,063                                                                    | 30,372                            | 58.3%                                        |
| Not Normalized                                   | 87,006                   | 70,298                                                                    | 34,279                            | 48.8%                                        |
| Kmer = 19                                        | 50,483                   | 37,239                                                                    | 20,678                            | 55.5%                                        |
| Kmer = 31 <sup>6</sup>                           | 55,047                   | 47,108                                                                    | 29,194                            | <b>62.0%</b>                                 |
| Jaccard clip                                     | 60,974                   | 52,024                                                                    | 30,298                            | 58.2%                                        |
| Insert size = 300                                | 60,934                   | 52,095                                                                    | 30,350                            | 58.2%                                        |
| Kmer = 31 and Jaccard clip                       | 60,786                   | 52,145                                                                    | 30,360                            | 58.2%                                        |

<sup>1</sup> Trinity default settings included (i) normalization; (ii) k-mer size = 25; (iii) maximum distance between read pairs = 500 nt; (iv) no “jaccard clip”. Jaccard clip prevents fusion transcripts in gene dense genomes.

<sup>2</sup> Number of *de novo* assembled transcripts built with the B73 reads.

<sup>3</sup> Number of proteins predicted.

<sup>4</sup> Number of proteins that had matches in the B73 proteome using BlastP.

<sup>5</sup> The accuracy of each optimization run was evaluated with a python script that determined % recovery of transcripts that matched annotated B73 genes (100% ID over 75% of transcript length).

<sup>6</sup> Default parameters with Kmer=31 gave the highest recovery of B73 proteins, and these Trinity parameters were chosen for the *de novo* assembly of unmapped reads from B73-QTL plants.

**Table S2.** Oligonucleotide primers used in this study.

| <b>Primer name</b>  | <b>Primer sequence (5' to 3')</b> | <b>Tm (°C)</b> | <b>Source</b>        |
|---------------------|-----------------------------------|----------------|----------------------|
| Lectin-F            | TACCAGGCCAACAAATACCTC             | 54             | This study           |
| Lectin-R            | CACACTGGTTCGAAGGTTCTA             | 54             | This study           |
| L-RLK-qFor e4       | TGCCGAAGAGTTCAGGAATG              | 62             | This study           |
| L-RLK-qRev e7       | TGACTGATGAGTCCACCAAATC            | 62             | This study           |
| L-RLK e7 F1         | AACGACGACACTTCCAACCTC             | 62             | This study           |
| L-RLK e7 R1         | CTGGCACAGTGAGACTCATATC            | 62             | This study           |
| L-RLK e4e5 F1 (cml) | CTTCCTCTTTGACTCTTC                | 53             | This study           |
| L-RLK e5 R1 (cml)   | GTTAATCTCGAGTCCTG                 | 52             | This study           |
| L-RLK e4e5 F2 (b73) | CTTCCTCTTTGATTCTGC                | 55             | This study           |
| L-RLK e5 R2 (b73)   | GTTAATCTCGAGTCTTG                 | 51             | This study           |
| RPOL F              | AGCCAAAACGCTAAAGTGGA              | 55             | (Ma et al., 2006)    |
| RPOL R              | TAAGTGACGAGCAAGGCAAA              | 55             | (Ma et al., 2006)    |
| Banana actin F      | ACCGAAGCCCCTCTTAACCC              | 55             | (Van den Berg, 2004) |
| Banana actin R      | GTATGGCTGACACCATCACC              | 55             | (Van den Berg, 2004) |

Ma, J., Morrow, D., Fernandes, J., and Walbot, V. (2006). Comparative profiling of the sense and antisense transcriptome of maize lines. *Genome Biology* 7(3), R22. doi: 10.1186/gb-2006-7-3-r22.

Van den Berg, N., Crampton, B.G., Hein, I., Birch, P.R., and Berger, D.K. (2004). High-throughput screening of suppression subtractive hybridization cDNA libraries using DNA microarray analysis. *Biotechniques* 37(5), 818-824. doi: 10.2144/04375RR02.

**Table S3.** RNA-seq reads obtained from the maize B73-QTL leaf samples.

| Sample <sup>a</sup> | Leaf <sup>b</sup> | Treatment <sup>c</sup>        | Replicate <sup>d</sup> | Raw reads <sup>e</sup> | Q20<br>(%) <sup>f</sup> | GC<br>(%) <sup>g</sup> | Read<br>length (nt) <sup>h</sup> | Reads<br>(filtered) <sup>i</sup> | Total<br>nucleotides <sup>j</sup> | Read pairs<br>(filtered) <sup>k</sup> |
|---------------------|-------------------|-------------------------------|------------------------|------------------------|-------------------------|------------------------|----------------------------------|----------------------------------|-----------------------------------|---------------------------------------|
| B10R1A              | Upper             | Control                       | 1                      | 27 869 614             | 97.5                    | 53.7                   | 75                               | 21 836 776                       | 1 637 758 200                     | 10 918 388                            |
| B10R1B              | Lower             | <i>C. zeina</i><br>challenged | 1                      | 25 479 860             | 96.8                    | 54.3                   | 75                               | 17 097 912                       | 1 282 343 400                     | 8 548 956                             |
| B10R2A              | Upper             | Control                       | 2                      | 27 306 096             | 97.4                    | 54.0                   | 75                               | 20 993 770                       | 1 574 532 750                     | 10 496 885                            |
| B10R2B              | Lower             | <i>C. zeina</i><br>challenged | 2                      | 25 251 354             | 96.3                    | 54.9                   | 75                               | 16 352 460                       | 1 226 434 500                     | 8 176 230                             |
| B10R3A              | Upper             | Control                       | 3                      | 25 058 218             | 96.2                    | 53.8                   | 75                               | 15 682 524                       | 1 176 189 300                     | 7 841 262                             |
| B10R3B              | Lower             | <i>C. zeina</i><br>challenged | 3                      | 24 194 948             | 97.6                    | 54.5                   | 75                               | 17 958 650                       | 1 346 898 750                     | 8 979 325                             |

a. The name of the RNAseq sample.

b. Sample source - upper or lower leaf.

c. Samples collected at 77 dap, so lower leaves were exposed to *C. zeina* inoculum from the soil and stubble (labelled "*C. zeina* challenged", whereas upper leaves had minimal exposure to the pathogen, and thus labelled as "Control")

d. Biological replicate

e. Total raw reads per sample

f. The percentage of nucleotides with Q scores > 20 prior to filtering.

g. GC percentage of total nucleotides sequenced prior to filtering.

h. Nucleotide read length of each paired end after removal of adaptor sequences, and quality trimming.

i. Total RNAseq reads after filtering (removal of low-quality and single end reads).

j. Total nucleotides sequenced after filtering.

k. Total RNAseq read pairs after filtering.
